# Supplementary figures and images for: Particle size and morphology control of the negative thermal expansion material cubic zirconium tungstate
Source: Royal Society of Chemistry journal article supplement (doi:10.1039/b820014a), 2009-01-01

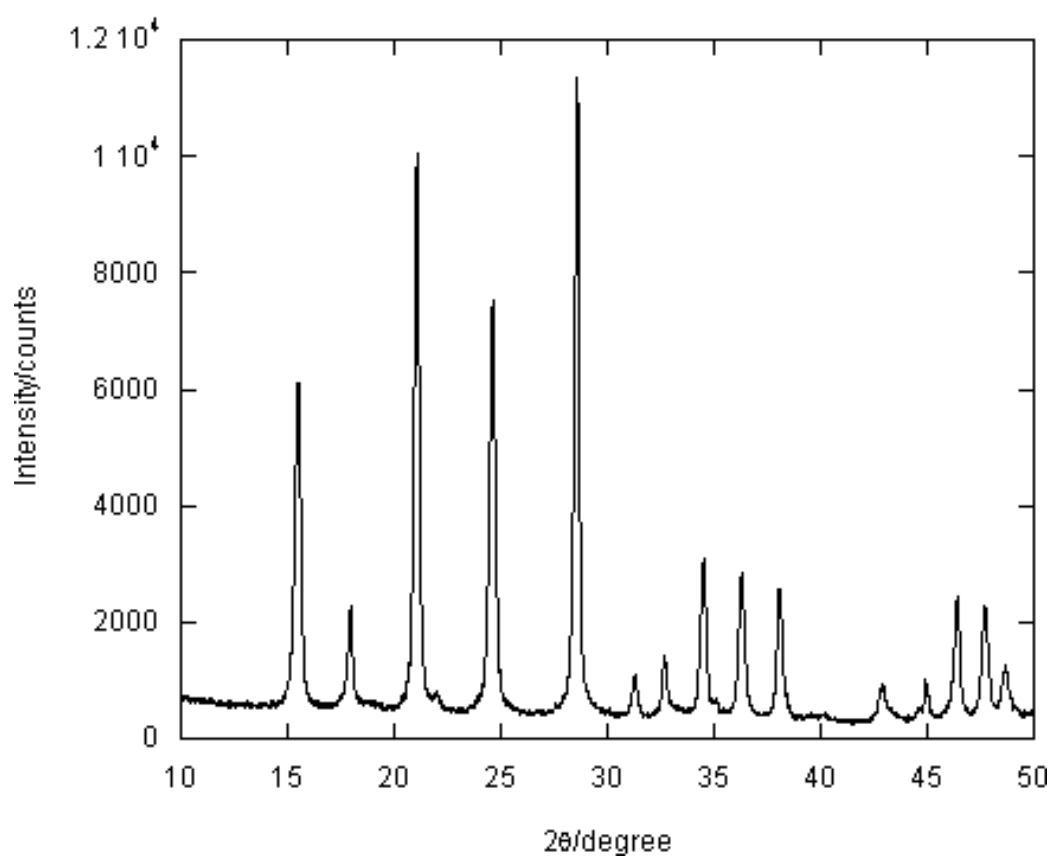

Supplement: b820014a.pdf [file b820014a.pdf]
